# Supplementary material for: Anti‐Inflammatory Effect of ETAS®50 by Inhibiting Nuclear Factor‐κB p65 Nuclear Import in Ultraviolet‐B‐Irradiated Normal Human Dermal Fibroblasts
Source: Hindawi journal article supplement (doi:10.1155/2018/5072986), 2018-01-01
Supplement: f1 [file 5072986.f1.pdf]

Evidence-Based Complementary and Alternative Medicine

*Research Article*

**Anti-Inflammatory Effect of ETAS<sup>®</sup>50 by Inhibiting Nuclear Factor- $\kappa$ B p65 Nuclear Import in Ultraviolet-B-Irradiated Normal Human Dermal Fibroblasts**

**Ken Shirato,<sup>1</sup> Tomoko Koda,<sup>2</sup> Jun Takanari,<sup>3</sup> Takuya Sakurai,<sup>1</sup> Junetsu Ogasawara,<sup>4</sup> Kazuhiko Imaizumi,<sup>5</sup> Hideki Ohno,<sup>6</sup> and Takako Kizaki<sup>1</sup>**

*<sup>1</sup>Department of Molecular Predictive Medicine and Sport Science, Kyorin University School of Medicine, 6-20-2 Shinkawa, Mitaka, Tokyo 181-8611, Japan*

*<sup>2</sup>Faculty of Nursing, Tokyo Healthcare University, 2-5-1 Higashigaoka, Meguro, Tokyo 152-8558, Japan*

*<sup>3</sup>Amino Up Chemical Co. Ltd., 363-32 Shin-ei, Kiyota, Sapporo, Hokkaido 004-0839, Japan*

*<sup>4</sup>Department of Health Science, Asahikawa Medical University, 2-1-1-1 Midorigaoka-Higashi, Asahikawa, Hokkaido 078-8510, Japan*

*<sup>5</sup>Faculty of Human Sciences, Waseda University, 2-579-15 Mikajima, Tokorozawa, Saitama 359-1192, Japan*

*<sup>6</sup>Social Medical Corporation, the Yamatokai Foundation, 1-13-12 Nangai, Higashiyamato, Tokyo 207-0014, Japan*

Correspondence should be addressed to Ken Shirato; shirato@ks.kyorin-u.ac.jp

(a)

# IL-1 $\beta$

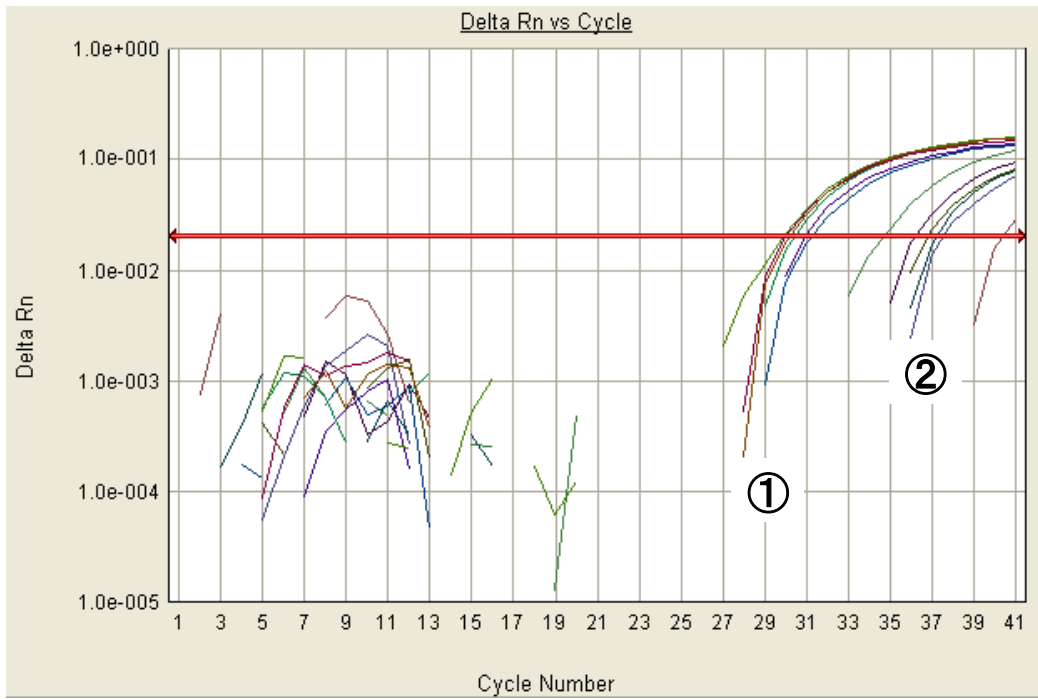

# 18S

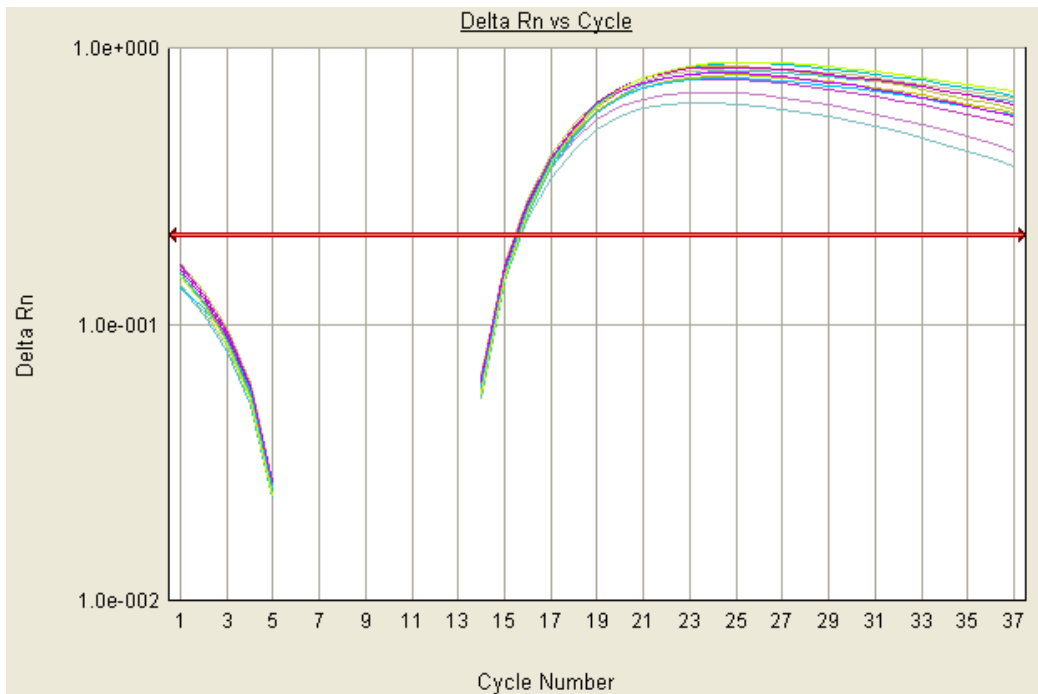

**(b)**

# IL-1 $\beta$

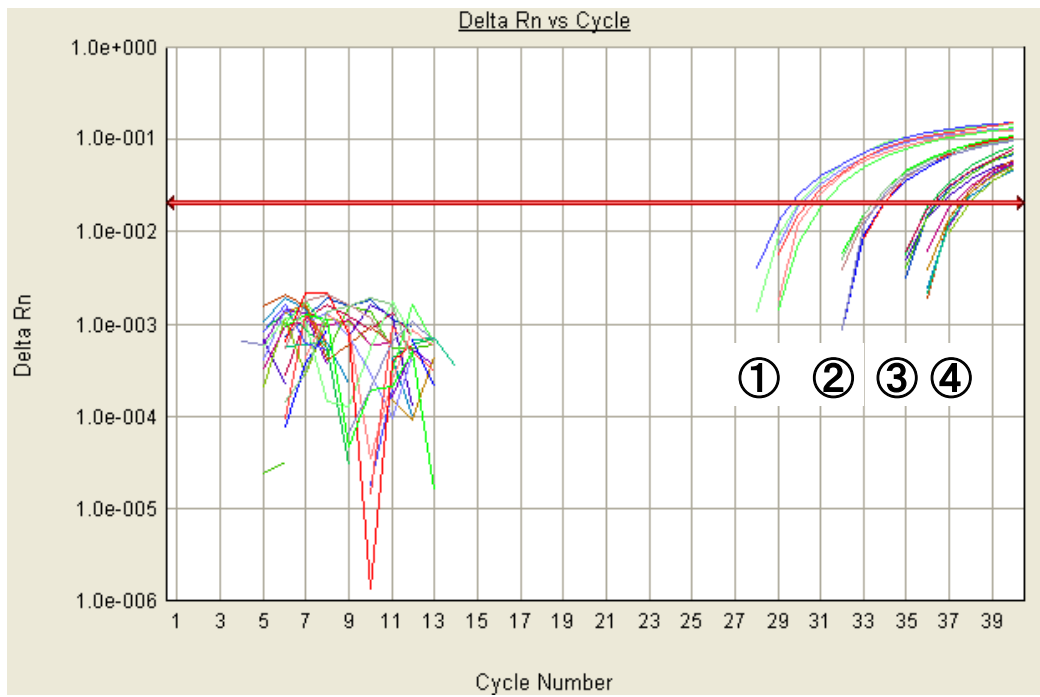

# 18S

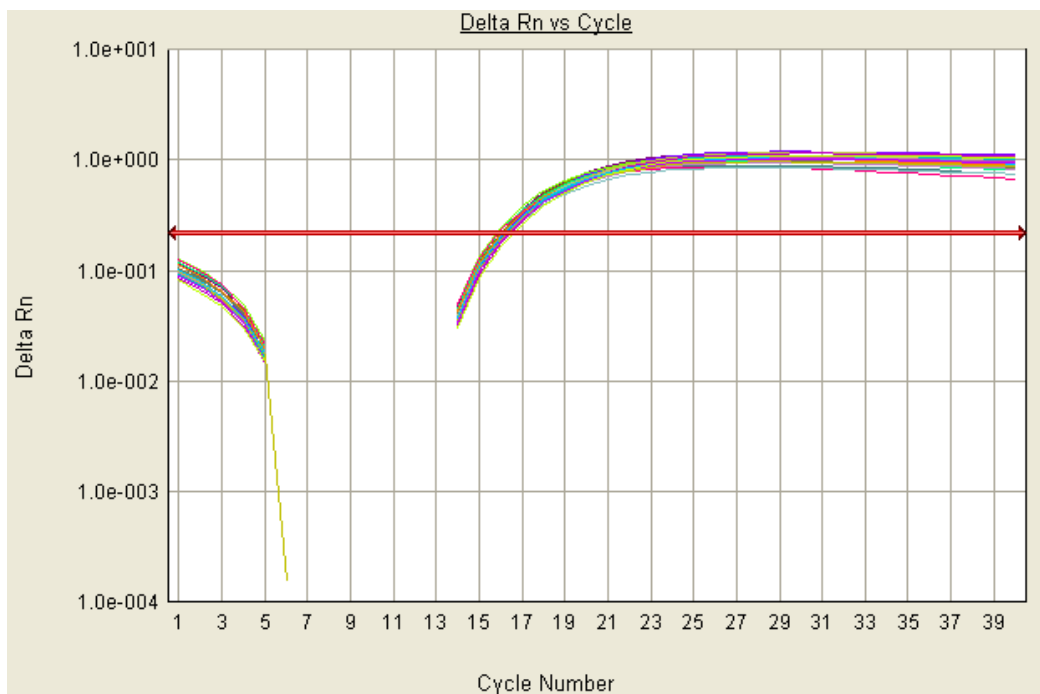

(c)

# IL-1 $\beta$

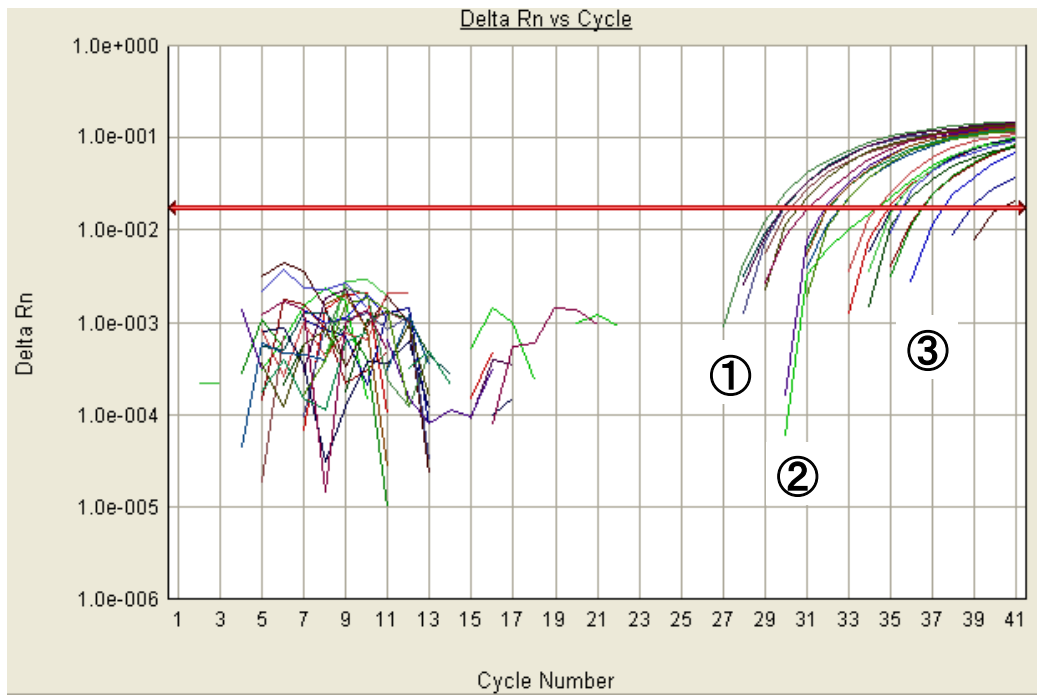

# 18S

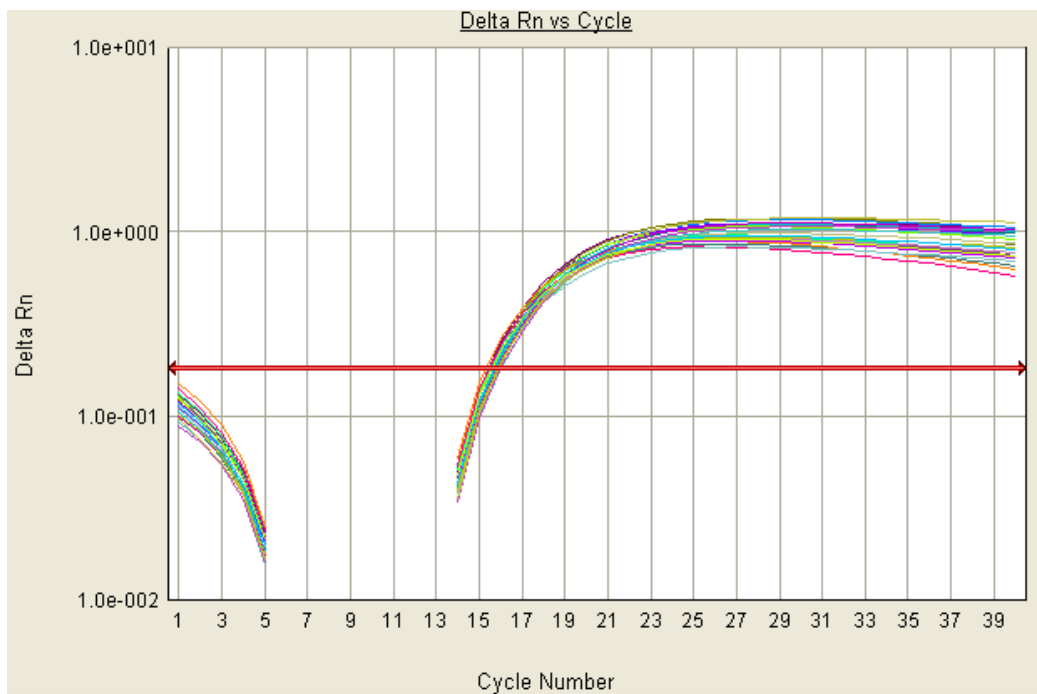

Supplementary FIGURE 1: The amplification chart of IL-1 $\beta$  and 18S obtained from each experiment by real-time PCR. (a) Effect of UV-B irradiation on the level of IL-1 $\beta$  mRNA of NHDFs (see Figure 1(c)). (1) the UV-B (-) group and (2) the UV-B (+) group. (b) Effect of JSH-23 on UV-B-induced IL-1 $\beta$  mRNA expression in NHDFs (see Figure 2(a)). (1) the UV-B (+)/JSH-23 (-) group; (2) the UV-B (+)/JSH-23 (+) group; (3) the UV-B (-)/JSH-23 (-) group; and (4) the UV-B (-)/JSH-23 (+) group. (c) Effect of ETAS on UV-B-induced IL-1 $\beta$  mRNA expression in NHDFs (see Figure 2(b)). (1) the UV-B (+)/ETAS (-) group; (2) the UV-B (+)/ETAS (+) group; and (3) the UV-B (-)/ETAS (-) and UV-B (-)/ETAS (+) groups. Since the present study used TaqMan probes for cDNA amplification, melt peak analysis could not be done.
